# Supplementary material
Source: Springer Nature journal article supplement (https://www.springermedizin.de/resource/supplementary/12958_2008_474_MOESM6_ESM.pdf/9568138)

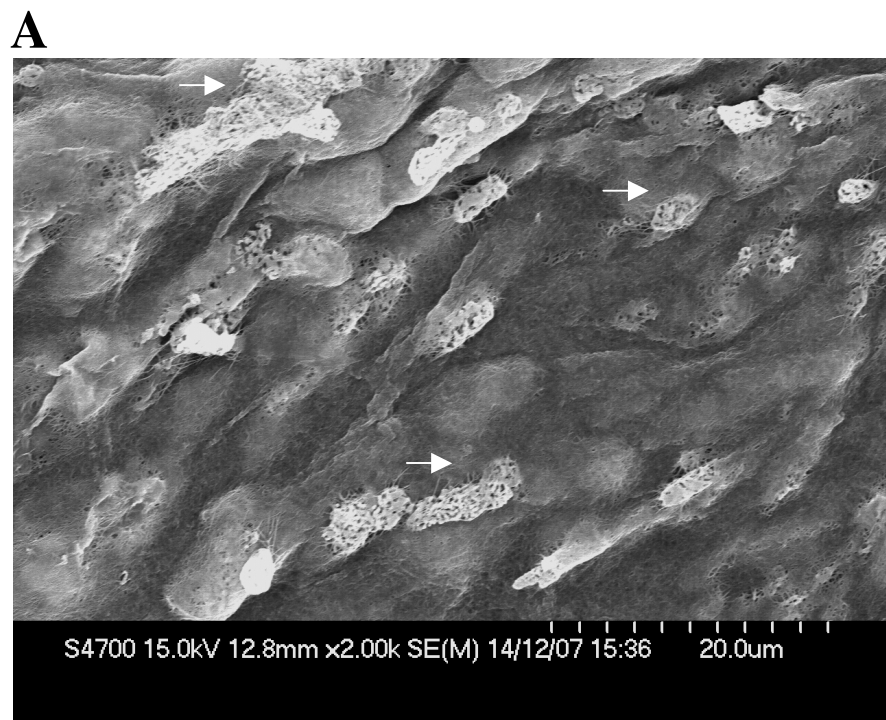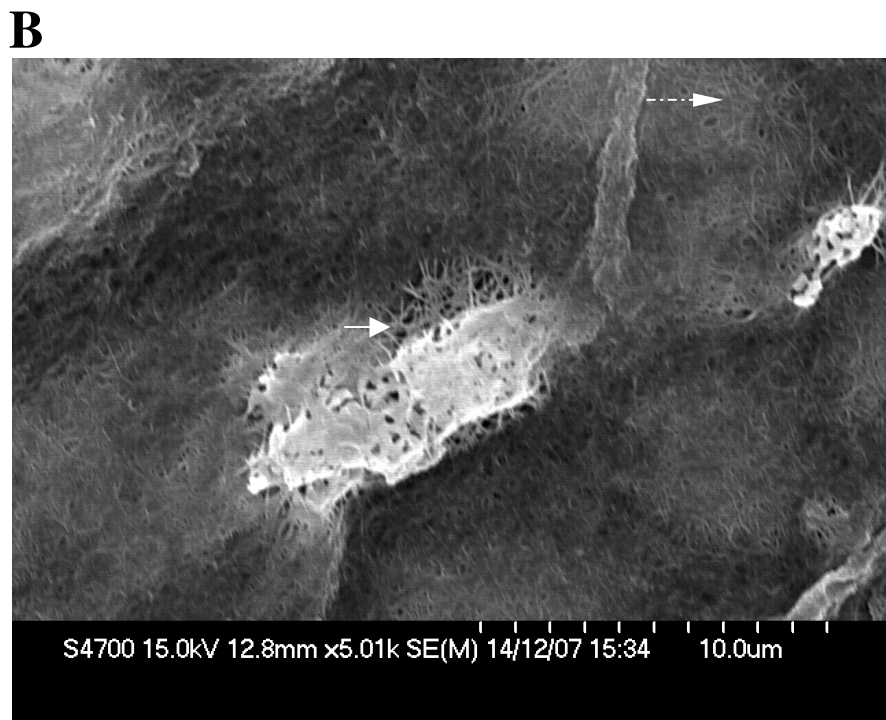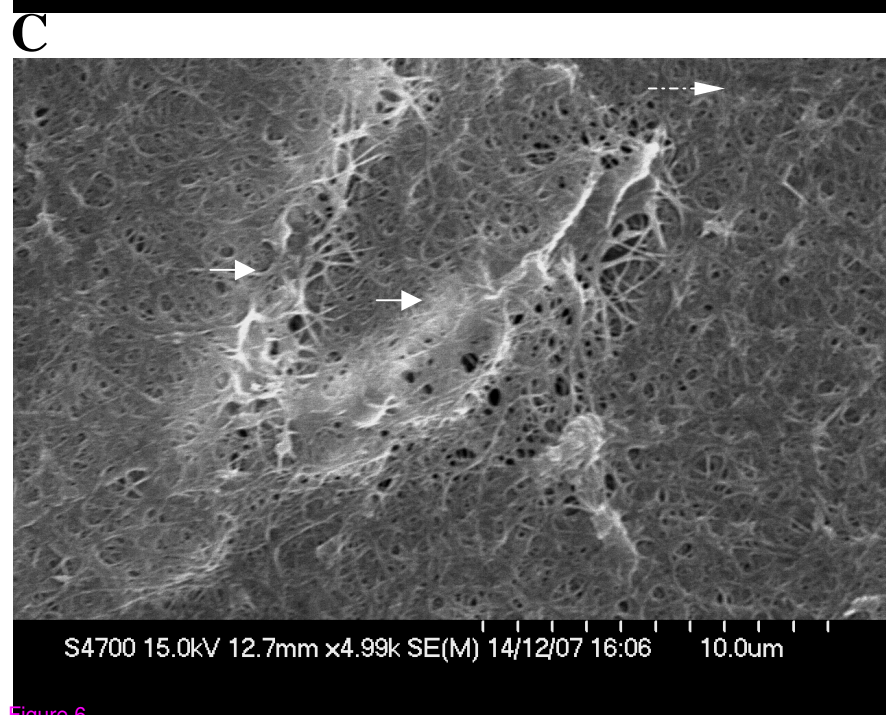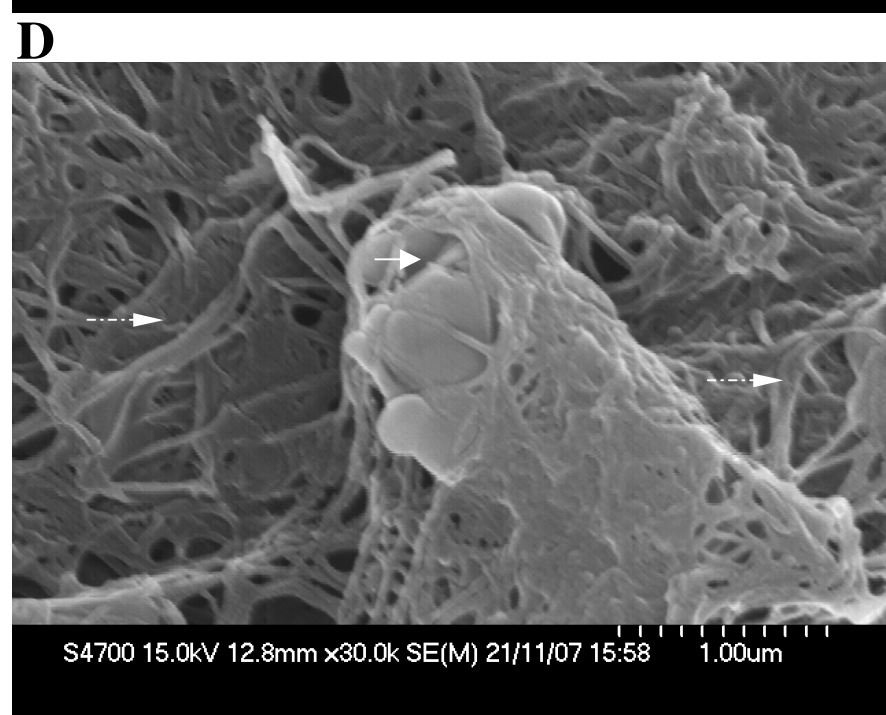

Figure 6

Supplement: MOESM6 [file 9568138]
